# Supplementary material
Source: publisher site journal article supplement (https://www.dovepress.com/article/supplementary_file/550656/550656%20Revised%20supplementary%20table.xlsx)
Supplement: Supplementary file 1 [file 550656%20Revised%20supplementary%20table.xlsx]

## Sheet: Sheet1
Supplementary Table 1. Pathogens of enrolled bloodstream infections.
Pathogens	Counts	Percentage(%)
Staphylococcus	125	24.51
Escherichia coli	92	18.04
Klebsiella pneumoniae	88	17.26
Enterococcus faecium	39	7.64
Pseudomonas aeruginosa	34	6.67
Candida	30	5.89
Enterococcus faecalis	25	4.9
Burkholderia cepacia	12	2.35
Streptococcus	10	1.96
Acinetobacter baumannii	9	1.76
Stenotrophomonas maltophilia	9	1.76
Serratia marcescens	9	1.76
Klebsiella oxytoca	3	0.59
Achromobacter xylosoxidans	3	0.59
Enterobacter cloacae	3	0.59
Enterobacter asburiae	2	0.39
Acinetobacter lwoffii	2	0.39
Enterococcus raffinosus	2	0.39
Ralstonia pickettii	2	0.39
Proteus mirabilis	2	0.39
Enterococcus casseliflavus	2	0.39
Ralstonia mannitolilytica	2	0.39
Enterococcus avium	1	0.2
Aerococcus viridans	1	0.2
Enterobacter aerogenes	1	0.2
Klebsiella ozaenae	1	0.2
Cutibacterium acnes	1	0.2
